# Supplementary material for: Investigating the Short Peptidome Profile of Italian Dry-Cured Ham at Different Processing Times by High-Resolution Mass Spectrometry and Chemometrics
Source: MDPI journal article supplement (doi:10.3390/ijms23063193), 2022-03-16
Supplement: s1 [file s1]

## Supplementary Material

### Investigating the short peptidome profile of Italian dry-cured ham at different processing times by high-resolution mass spectrometry and chemometrics

Andrea Cerrato <sup>1</sup>, Sara Elsa Aita <sup>1</sup>, Anna Laura Capriotti <sup>1,\*</sup>, Chiara Cavaliere <sup>1</sup>, Angela Michela Immacolata Montone <sup>2,3</sup>, Carmela Maria Montone <sup>1</sup>, and Aldo Laganà <sup>1</sup>

<sup>1</sup> Department of Chemistry, Sapienza University of Rome, Piazzale Aldo Moro 5, 00185, Rome, Italy; [andrea.cerrato@uniroma1.it](mailto:andrea.cerrato@uniroma1.it) (A.C.); [saraelsa.aita@uniroma1.it](mailto:saraelsa.aita@uniroma1.it) (S.E.A.); [chiara.cavaliere@uniroma1.it](mailto:chiara.cavaliere@uniroma1.it) (C.C.); [carmelamaria.montone@uniroma1.it](mailto:carmelamaria.montone@uniroma1.it) (C.M.M.); [aldo.lagana@uniroma1.it](mailto:aldo.lagana@uniroma1.it) (A.L.);

<sup>2</sup> Istituto Zooprofilattico Sperimentale del Mezzogiorno, Via Salute 2, Portici, 80055 Naples, Italy; [angela.montone@izsmportici.it](mailto:angela.montone@izsmportici.it) (A.M.I.M.)

<sup>3</sup> Department of Industrial Engineering, Università degli Studi di Salerno, Via Giovanni Paolo II 132, 84084 Fisciano, Italy

\* Correspondence: [annalaura.capriotti@uniroma1.it](mailto:annalaura.capriotti@uniroma1.it) (A.L.C.); Tel.: (optional; include country code; if there are multiple corresponding authors, add author initials)

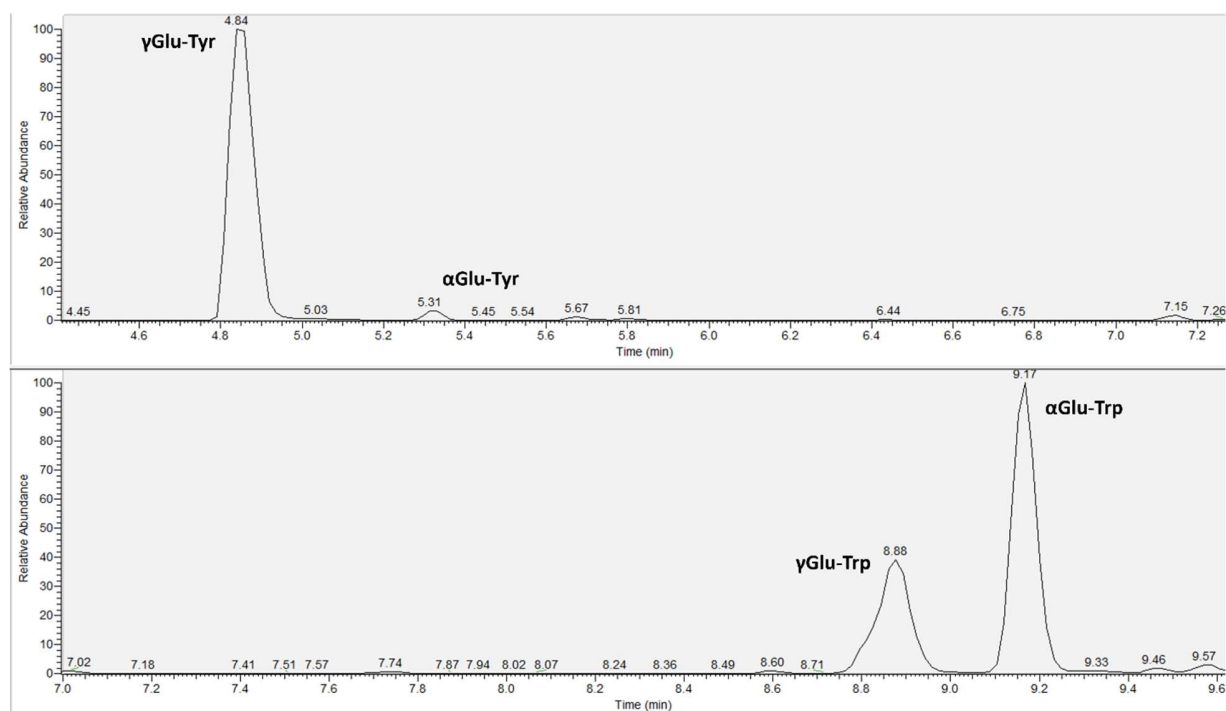

**Figure S1.** Chromatographic peaks of annotated  $\alpha$  and  $\gamma$ -glutamyl amino acids in dry-cured ham samples. Retention time was employed for discriminating the two isomers.

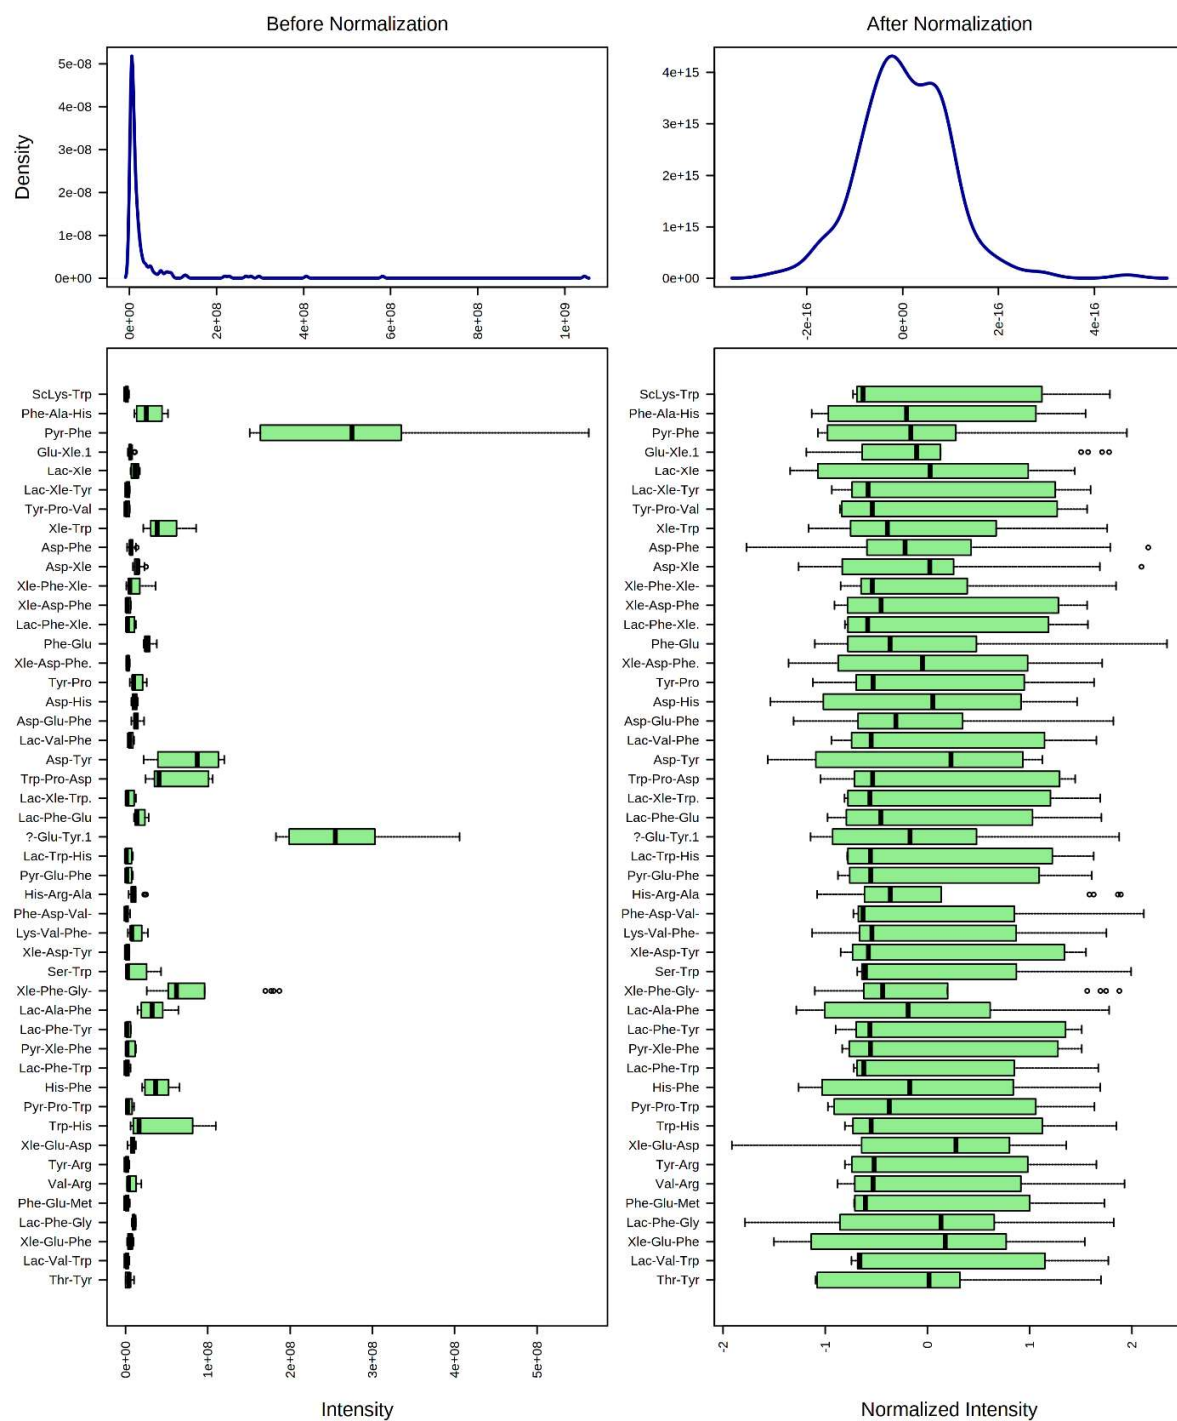

**Figure S2.** Summary of the normalization of the short peptides performed by autoscaling of each variable. The boxplots show 50 features/samples due to space limitation; the density plots are based on all data.

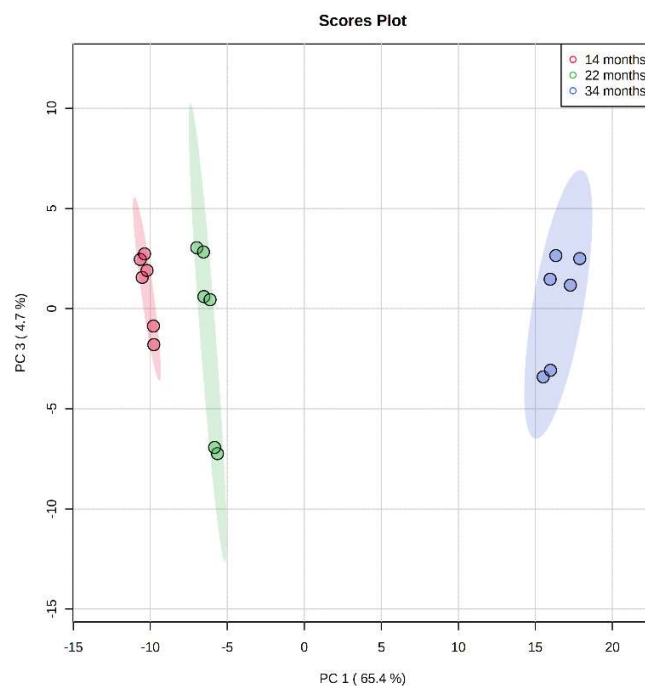

**Figure S3.** PCA modeling (PC1 vs PC3, scores plot) of dry-cured ham samples at the three different processing stages (14, 22, and 34 months) based on the short peptide datasets.

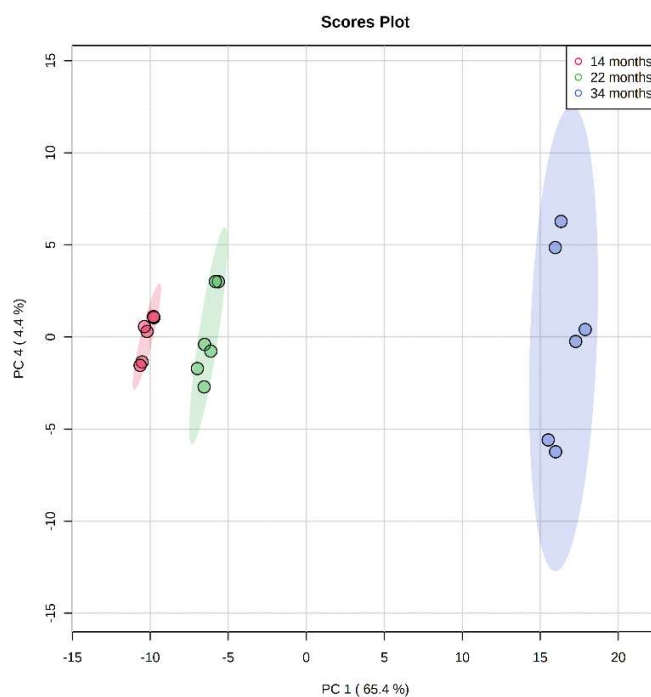

**Figure S4.** PCA modeling (PC1 vs PC4, scores plot) of dry-cured ham samples at the three different processing stages (14, 22, and 34 months) based on the short peptide datasets.

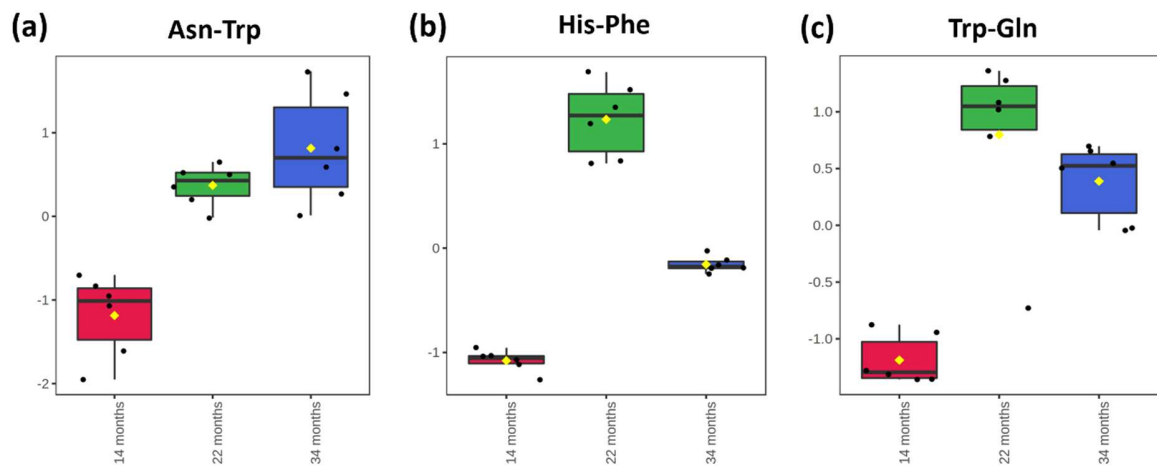

**Figure S5.** Box and whisker plots showing the abundances of three exemplary dipeptides Asn-Trp (a), His-Phe (b), and Trp-Gln (c) that had a significant increase from T1 to T2.

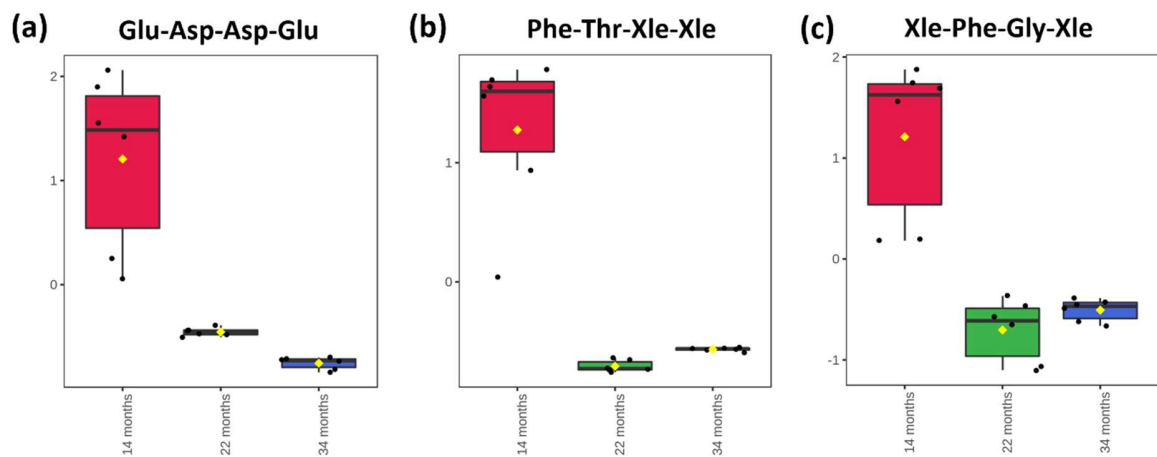

**Figure S6.** Box and whisker plots showing the abundances of three exemplary tetrapeptides Glu-Asp-Asp-Glu (a), Phe-Thr-Xle-Xle (b), and Xle-Phe-Gly-Xle (c) that had a significant decrease from T1 to T2.

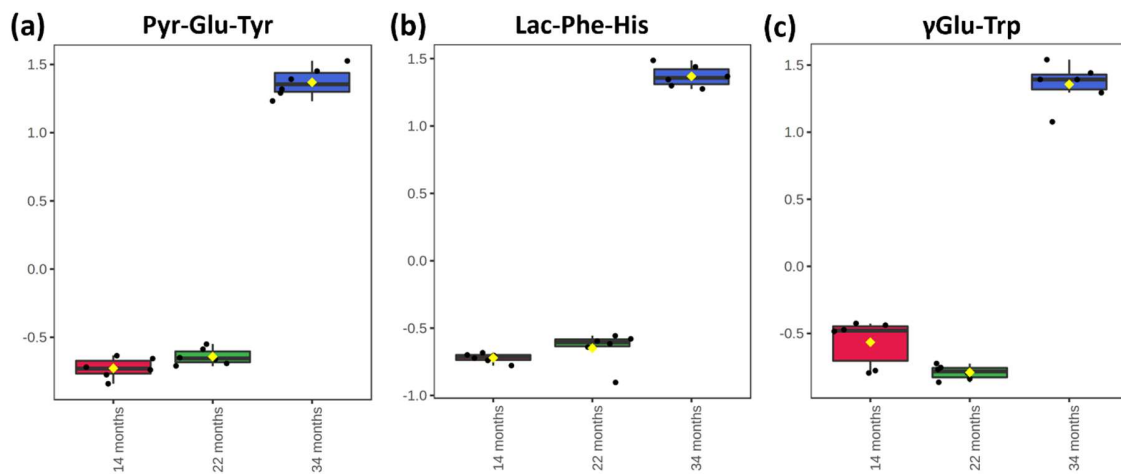

**Figure S7.** Box and whisker plots showing the abundances of three exemplary non-proteinogenic amino acid-containing peptides Pyr-Glu-Tyr (a), Lac-Phe-Xle (b), and  $\gamma$ -Glu-Trp (c) that had a significant increase from T2 to T3.

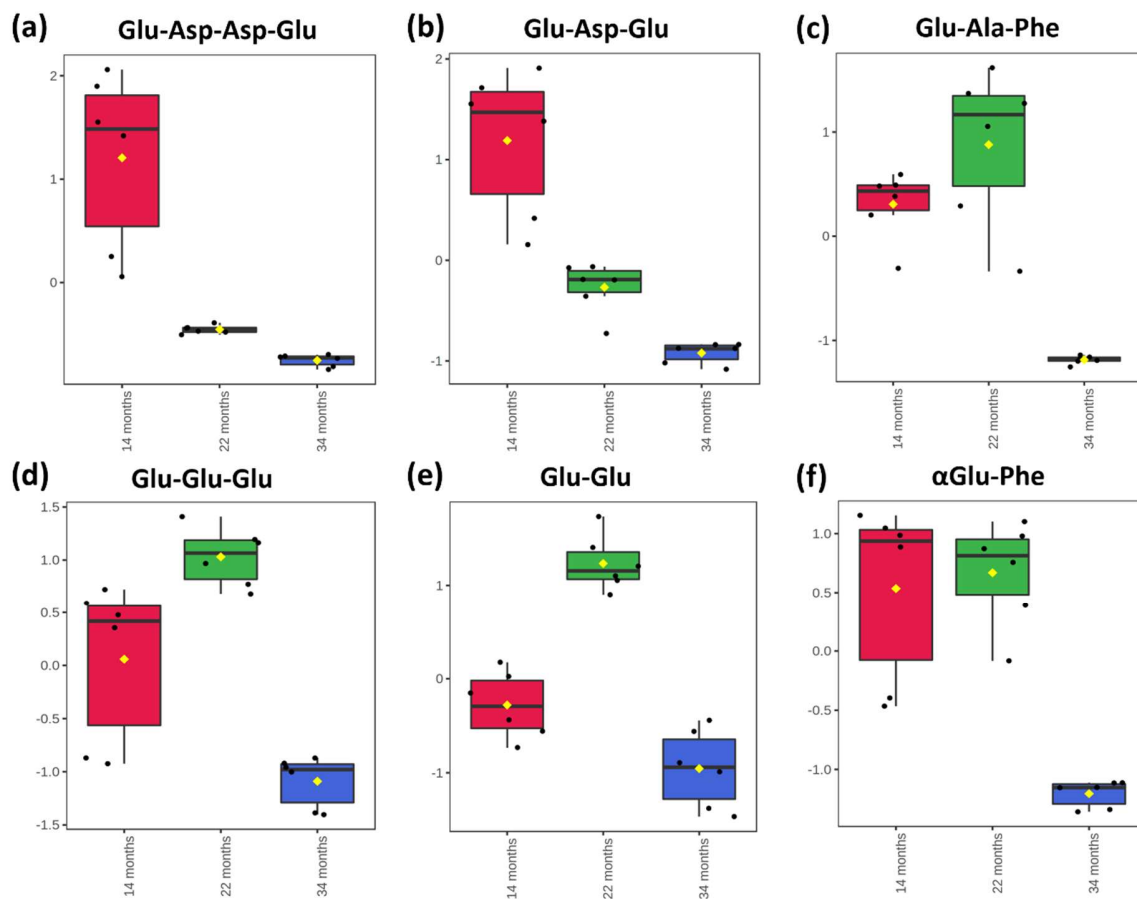

**Figure S8.** Box and whisker plots showing the abundances of short peptides with an N-terminal glutamic acid Glu-Asp-Asp-Glu (a), Glu-Asp-Glu (b), Glu-Ala-Phe (c), Glu-Glu-Glu (d), Glu-Glu (e), and  $\alpha$ -Glu-Phe that had a significant decrease from T1/T2 to T3.
